# Supplementary material
Source: PubMed Central journal article supplement (PMC4299140)
Supplement: supp_dev.117887_DEV117887supp.pdf [file supp_dev.117887_DEV117887supp.pdf]

## MATERIALS AND METHODS

### Generation of *pMes-Pitx2c* transgenic mice

To generate *pMes-Pitx2c* conditional transgenic mice, the coding sequence of the mouse *Pitx2c* cDNA was cloned into *pMES-IRES-Egfp* vector (Xiong et al. 2009) in front of the *IRES-Egfp* sequence under the control of the chick  $\beta$ -actin promoter. A *STOP* cassette flanked by *LoxP* sequences was inserted between the  $\beta$ -actin promoter and the *Pitx2c* sequence. Pronuclear injection was conducted at Tulane University Uptown Transgenic/Knockout Facility.

### Vector construction and Mutagenesis

The construction of *Myc*-tagged mouse *Wnts* expression vectors have been reported previously (Zhu et al. 2013). *Nog-FLAG* expression vector was generated by cloning full-length mouse *Noggin* into the C-terminus of *pFLAG-CMV* vector (Sigma). *pc-Wnt3* and *pc-Nog* were generated by cloning *Wnt3* full-length cDNAs with a *FLAG* tag or *Nog* full-length cDNA with a *HA* tag into *pcDNA3.1* vector, respectively. To generate *Nog( $\Delta$ CRD)*, PCR was performed with *pc-Nog* plasmid as template with the following primers: forward: 5'-aaaccatggATGGAGCGC TGCCCCAGCCTGGGGGTCAC-3', reverse: 5'-aaactcgagCTAAGCGTAATCTGGAACATCGT ATGGGTAGCTGCCACCTTCACGTAGCG-3'. To generate *Nog( $\Delta$ clip)*, overlap PCR was used with the following primers: forward: same as that used for *Nog( $\Delta$ CRD)*, reverse: 5'-aaactcgagCT AAGCGTAATCTGGAACATCGTATGGGTAGCAGGAACACTTACTCGGA-3', and two reverse complementary sequences, S1: 5'-GGCATGGCCCCCGACGGCCGCTGCCGCAGC AGCGAGCGCAGCAGCGTCTCGTTCAGATC-3', S2: 5'-GATCTGAACGAGACGCTGCTGC GCTCGCTGCTGCGGCAGCGGCCGTCGGGGGCCATGCC-3'. The forward primer contains a

5'-aaaccatgg-*NcoI* overhang, and the reverse primers contain a 5'-aaactcgag-*XhoI* overhang and a *HA* sequence (marked with underline) followed by a stop codon. All the PCR products were gel-purified, digested with *NcoI* and *XhoI*, and subcloned into *pcDNA3.1* vector.

### **RT-PCR and Quantitative real time RT-PCR (qRT-PCR)**

Molar germs isolated from timed embryos were subjected to RNA extraction with RNase Mini Kit (Qiagen) and reversely transcribed using SuperScript III First Strand Synthesis System (Invitrogen). The expressions of *Noggin*, *Wnt-4*, *-5a*, *-6*, *-7b*, *-10a*, *-10b*, *Tgfb1*, and *Tgfb2* in *K14Cre;pNog* and wild type controls were detected by qRT-PCR or RT-PCR. The primers were showed in supplemental Table 1.

### **REFERENCES**

- Xiong, W., He, F., Morikawa, Y., Yu, X., Zhang, Z., Lan, Y., Jiang, R., Cserjesi, P., and Chen, Y.** (2009). Hand2 is required in the epithelium for palatogenesis in mice. *Dev. Biol.* **330**, 131-41.
- Zhu, X., Zhao, P., Liu, Y., Zhang, X., Fu, J., Ivy Yu, H.M., Qiu, M., Chen, Y., Hsu, W., and Zhang, Z.** (2013). Intra-epithelial requirement of canonical Wnt signaling for tooth development. *J. Biol. Chem.* **288**, 12080-12089.

**Supplemental Table 1.** Oligonucleotide primer sequences used in qRT-PCR or RT-PCR

| Gene          | Sequence (5'-3')                                                 |
|---------------|------------------------------------------------------------------|
| <i>Nog</i>    | F: CCAGCACTATCTACACATCCG<br>R: GATAGGGTCTGGATGTTTCGATG           |
| <i>Wnt4</i>   | F: GACTCCTCGTCTTCGCCGTGTTCTCG<br>R: GTTTGCACATCTGCACCTGCCTCTGG   |
| <i>Wnt5a</i>  | F: TGCCATGTCTTCCAAGTTCTTCCTAATG<br>R: TGATGCCTGTCTTCGCACCTTCTCCA |
| <i>Wnt6</i>   | F: GGGAGGCTGCGGAGACGATGTGGACTT<br>R: TCGGGTGAATCGGCTGCGTAGAGGAG  |
| <i>Wnt7b</i>  | F: CTTCGGGCAAGAACTCCGAGTAGGGA<br>R: CCAGCCTTCCGCCTGGTTGTAGTAGC   |
| <i>Wnt10a</i> | F: TCGCCATCCATGAGTGCCAGCATCAG<br>R: ACCGCAAGCCTTCAGTTTACCCAGA    |
| <i>Wnt10b</i> | F: GGGGTGGCTGTAACCACGACATGGAC<br>R: CCCAGAGTAGGGTCTCGCTCGCAGAA   |
| <i>Tgfb1</i>  | F: TGGCTGAACCAAGGAGACGGAATACA<br>R: CAGGGTCCCAGACGAAGTTGGCATG    |
| <i>Tgfb2</i>  | F: TCCCGCCCACTTTCTACAGACCCTAC<br>R: CCATCAATACCTGCAAATCTCGCCTC   |
| <i>GAPDH</i>  | F: CGCCTGGAGAAACCTGCCAAGTATGA<br>R: TGGAAGAGTGGGAGTTGCTGTTGAAGT  |

**FIGURE LEGENDS**

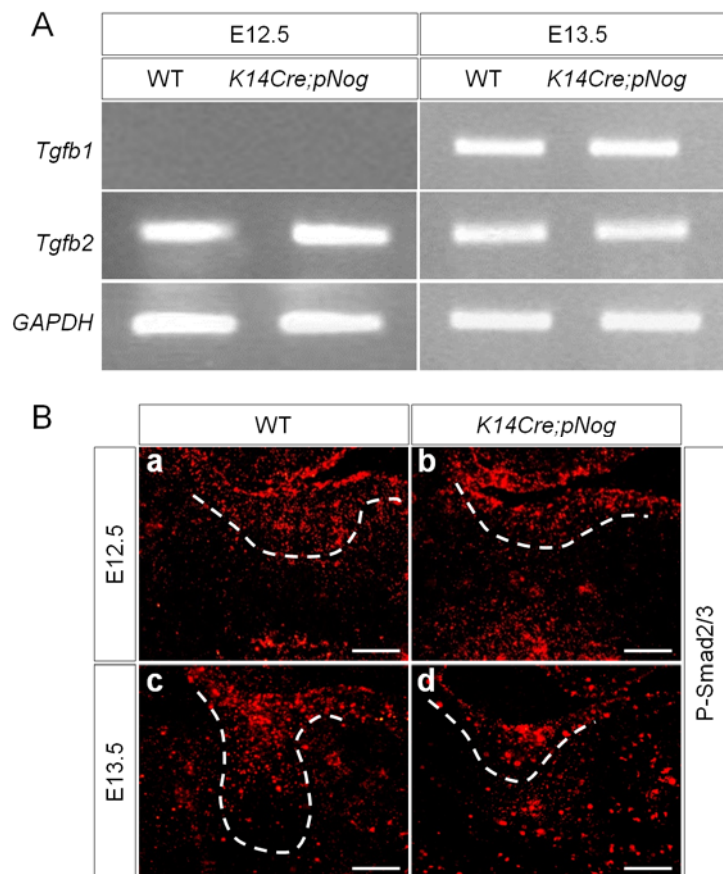

**Supplemental Fig. 1. TGF $\beta$  signaling is not altered in *K14Cre;pNog* molar germs. (A)** RT-PCR shows mRNA expression of *Tgfb1* and *Tgfb2* in controls and *K14Cre;pNog* tooth germs at E12.5 and E13.5. *GAPDH* is included as internal control. **(B)** Immunofluorescence of P-Smad2/3 in controls (a, c) and *K14Cre;pNog* (b, d) tooth germs at E12.5 (a, b) and E13.5 (c, d). Bar = 50  $\mu$ m.

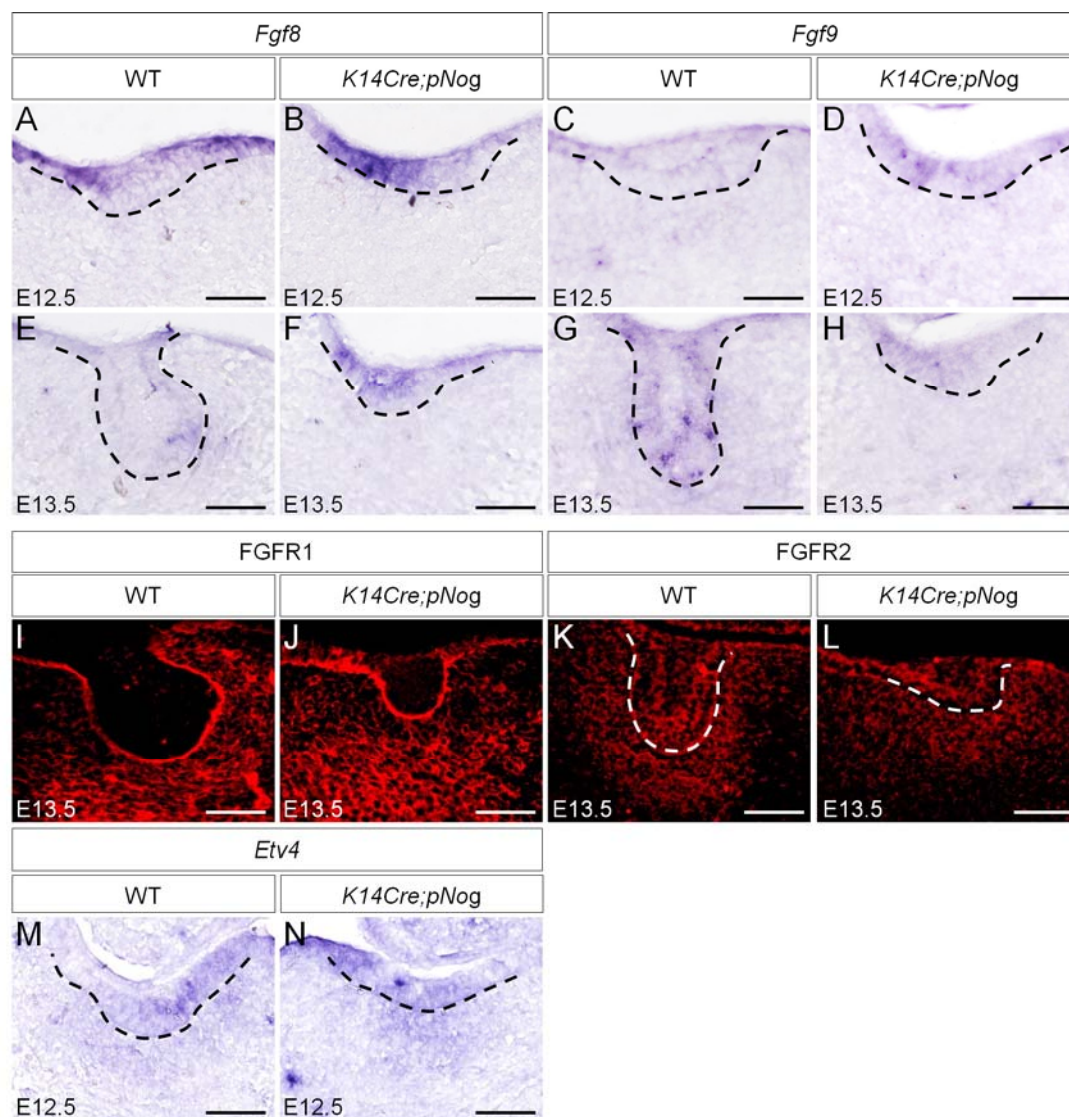

**Supplemental Fig. 2. FGF signaling is not affected in *K14Cre;pNog* molar germs.** (A-H) In situ hybridization assays on *Fgf8* (A, B, E, F) and *Fgf9* (C, D, G, H) in controls (A, C, E, G) and *K14Cre;pNog* (B, D, F, H) tooth germs at E12.5 (A-D) and E13.5 (E-H). (I-L) Immunofluorescence of FGFR1 (I, J) and FGFR2 (K, L) in controls (I, K) and *K14Cre;pNog* (J, L) tooth germs at E13.5. (M, N) In situ hybridization of *Etv4* in control (M) and *K14Cre;pNog* (N) tooth germs at E12.5. Bar = 50  $\mu$ m in all panels.

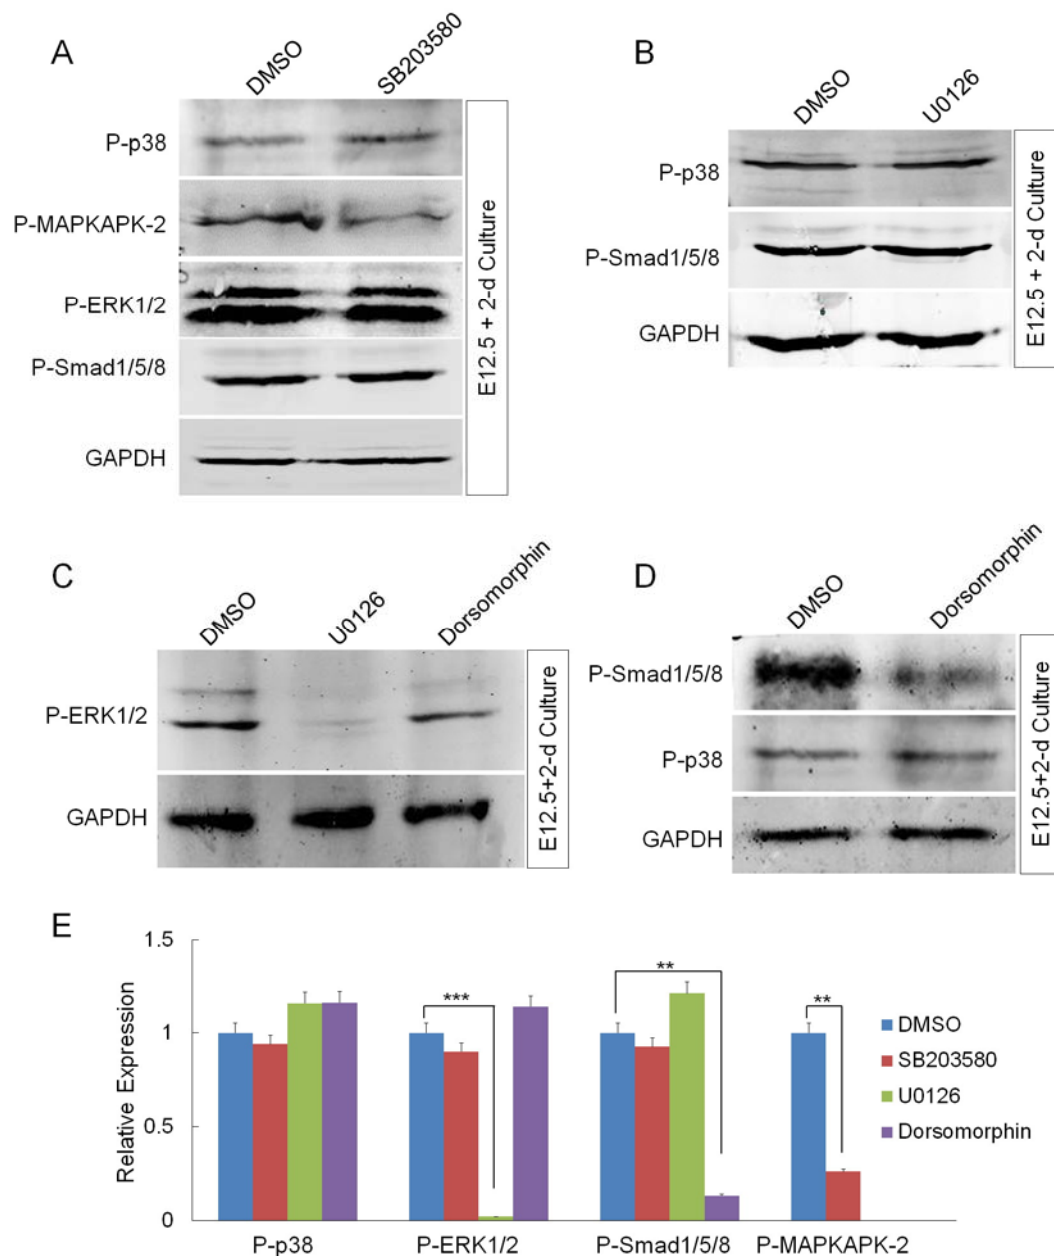

**Supplemental Fig. 3. The specificity and efficiency of small inhibitor molecules. (A-D)** Representative Western blots show expression of P-p38, P-MAPKAPK-2, P-ERK1/2, and P-Smad1/5/8 in E12.5 tooth germs after 2-day organ culture in the presence of 20  $\mu$ M of each inhibitor or DMSO as indicated. GAPDH was used as internal control. **(E)** Band quantification of A-D from three individual experiments. The protein levels in DMSO-treated group were set as one unit. \*\*:  $P < 0.01$ ; \*\*\*:  $P < 0.001$ .

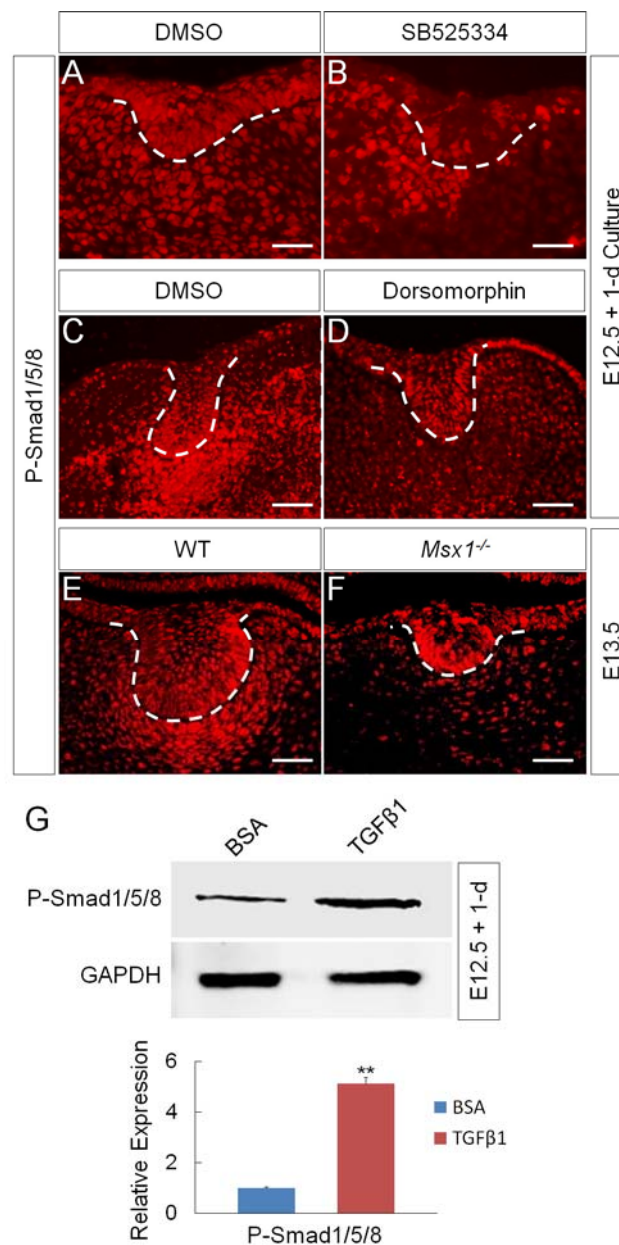

**Supplemental Fig. 4. TGFβ signaling is responsible for Smad1/5/8 activation in the dental epithelium. (A-D)** Immunofluorescence of P-Smad1/5/8 in E12.5 tooth germ after 1-day organ culture in the presence of SB525334 (B), Dorsomorphin (D) or DMSO (A, C). **(E-F)** Immunofluorescence of P-Smad1/5/8 in control (E) or *Msx1*<sup>-/-</sup> (F) tooth germs at E13.5. Bar = 50 μm in all panels. **(G)** Western blot shows P-Smad1/5/8 levels in dental epithelia that were separated from E12.5 tooth germs after 1-day organ culture with or without Tgfb1.



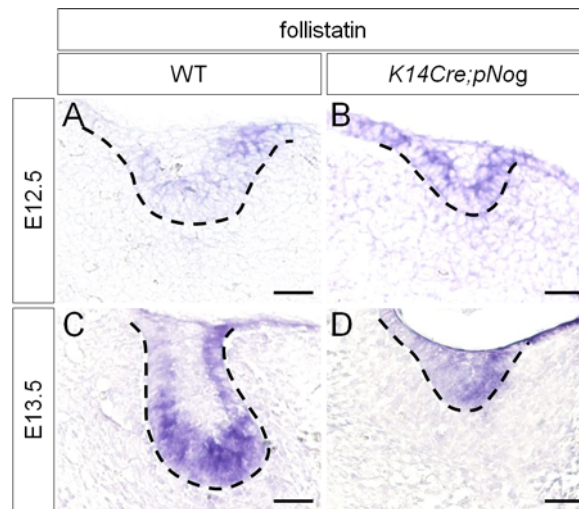

**Supplemental Fig. 5. Activin activity is not affected in *K14Cre;pNog* molar germs.** In situ hybridization of follistatin in controls (A, C) and *K14Cre;pNog* (B, D) tooth germs at E12.5 (A, B) and E13.5 (C, D). Bar = 50  $\mu$ m.



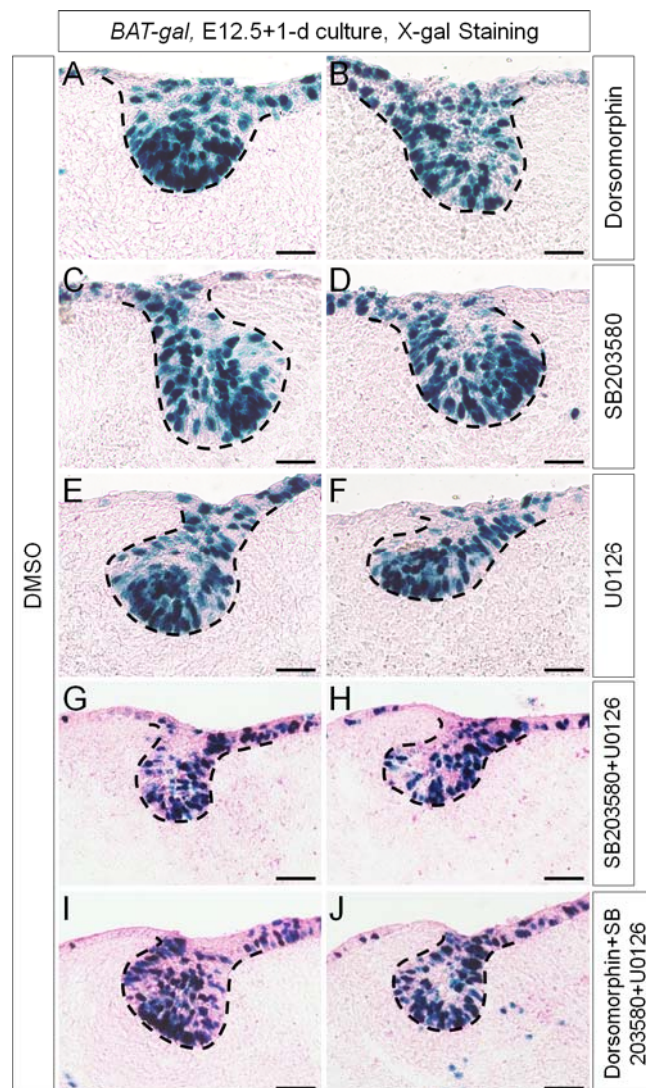

**Supplemental Fig. 6. Inhibition of BMP-mediated signaling pathways does not attenuate Wnt/ $\beta$ -catenin signaling activity.** X-gal staining of E12.5 *BAT-gal* tooth germs after 1 day organ culture in the presence of DMSO (A, C, E, G, I), dorsomorphin (B), SB203580 (D), U0126 (F), SB203580 and U0126 (H), dorsomorphin, SB203580 and U0126 (J). Bar = 50  $\mu$ m.

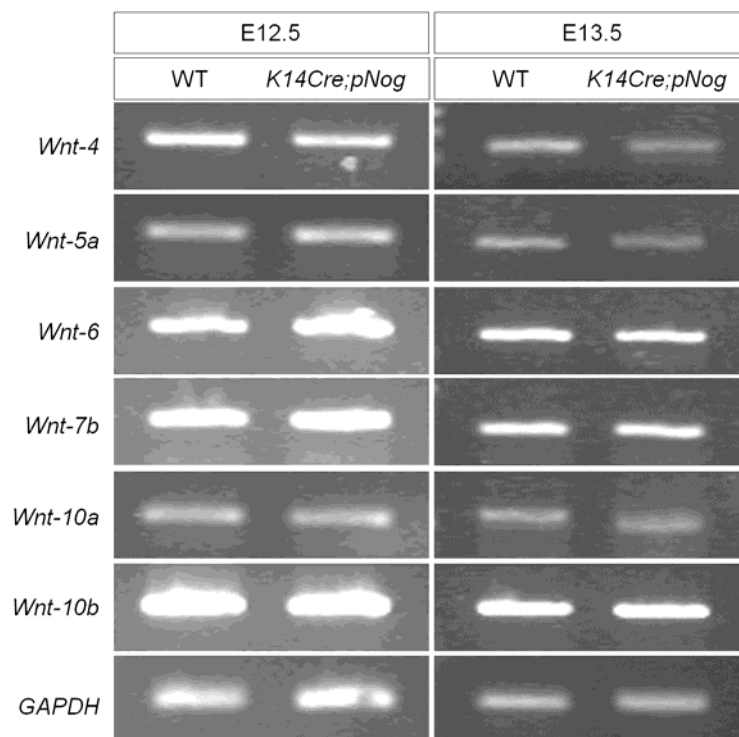

**Supplemental Fig. 7. Expression of Wnt ligands is not changed in *K14Cre;pNog* molar germs.**

RT-PCR shows mRNA expression of *Wnt-4*, *Wnt-5a*, *Wnt-6*, *Wnt-7b*, *Wnt-10a*, and *Wnt-10b* in controls and *K14Cre;pNog* tooth germs at E12.5 and E13.5. *GAPDH* is used as internal control.
